# Supplementary material
Source: MDPI journal article supplement (https://www.mdpi.com/2073-4441/15/6/1075)
Supplement: s1 [file s1]

## Supplementary Materials

**Table S1.** The 100 monthly circulation indices collected from the National Climate Center of China Meteorological Administration.

| Classification | Name                                                                         | Abbreviation |
|----------------|------------------------------------------------------------------------------|--------------|
| Atmospheric    | Northern Hemisphere Subtropical High Area Index                              | NHSHA        |
|                | North African Subtropical High Area Index                                    | NAHAI        |
|                | North African–North Atlantic–North American Subtropical High Area Index      | NAASHA       |
|                | Western Pacific Subtropical High Area Index                                  | WPSHA        |
|                | Eastern Pacific Subtropical High Area Index                                  | EPSHA        |
|                | North American Subtropical High Area Index                                   | NASHA        |
|                | Atlantic Subtropical High Area Index                                         | NASHAI       |
|                | North American–Atlantic Subtropical High Area Index                          | NAASHAI      |
|                | Pacific Subtropical High Area Index                                          | PSHA         |
|                | Northern Hemisphere Subtropical High Intensity Index                         | NHSH         |
|                | North African Subtropical High Intensity Index                               | NASHII       |
|                | North African–North Atlantic–North American Subtropical High Intensity Index | NAAASH       |
|                | Western Pacific Subtropical High Intensity Index                             | WPSH         |
|                | Eastern Pacific Subtropical High Intensity Index                             | EPSH         |
|                | North American Subtropical High Intensity Index                              | NASH         |
|                | North Atlantic Subtropical High Intensity Index                              | NASHI        |
|                | North American–North Atlantic Subtropical High Intensity Index               | NAASH        |
|                | Pacific Subtropical High Intensity Index                                     | PSHI         |
|                | Northern Hemisphere Subtropical High Ridge Position Index                    | NHRP         |
|                | Pacific Polar Vortex Intensity Index                                         | PPVI         |
|                | North American Polar Vortex Intensity Index                                  | NAPV         |
|                | Atlantic–European Polar Vortex Intensity Index                               | AEPVI        |
|                | Northern Hemisphere Polar Vortex Intensity Index                             | NVI          |
|                | Northern Hemisphere Polar Vortex Central Longitude Index                     | NVCL         |
|                | Northern Hemisphere Polar Vortex Central Latitude Index                      | NVCLI        |
|                | Northern Hemisphere Polar Vortex Central Intensity Index                     | NHPVCI       |
|                | Eurasian Zonal Circulation Index                                             | EZC          |
|                | Eurasian Meridional Circulation Index                                        | EMC          |
|                | Asian Zonal Circulation Index                                                | AZC          |
|                | Asian Meridional Circulation Index                                           | AMC          |
|                | East Asian Trough Position Index                                             | EATP         |
|                | East Asian Trough Intensity Index                                            | EATI         |
|                | Tibet Plateau Region 1 Index                                                 | TPR1         |
|                | Tibet Plateau Region 2 Index                                                 | TPR2         |
|                | India–Burma Trough Intensity Index                                           | IBTI         |
|                | Arctic Oscillation                                                           | AO           |
|                | Antarctic Oscillation                                                        | AAO          |
|                | North Atlantic Oscillation                                                   | NAO          |

| Classification  | Name                                                                              | Abbreviation |
|-----------------|-----------------------------------------------------------------------------------|--------------|
|                 | North African Subtropical High Ridge Position Index                               | NARP         |
|                 | North African–North Atlantic–North American Subtropical High Ridge Position Index | NANRP        |
|                 | Western Pacific Subtropical High Ridge Position Index                             | WWRP         |
|                 | Eastern Pacific Subtropical High Ridge Position Index                             | EPRP         |
|                 | North American Subtropical High Ridge Position Index                              | NSRP         |
|                 | South China Sea Subtropical High Ridge Position Index                             | SSRP         |
|                 | North American–North Atlantic Subtropical High Ridge Position Index               | NNRP         |
|                 | Pacific Subtropical High Ridge Position Index                                     | PSHRG        |
|                 | Western Pacific Sub Tropical High Western Ridge Point Index                       | WHWRP        |
|                 | Asia Polar Vortex Area Index                                                      | APVA         |
|                 | Pacific Polar Vortex Area Index                                                   | PPVA         |
|                 | North American Polar Vortex Area Index                                            | NAPVA        |
|                 | Atlantic–European Polar Vortex Area Index                                         | AEPVA        |
|                 | Northern Hemisphere Polar Vortex Area Index                                       | NHPVA        |
|                 | Asia Polar Vortex Intensity Index                                                 | APVI         |
|                 | Pacific/North American Pattern                                                    | PNA          |
|                 | East Atlantic Pattern                                                             | EA           |
|                 | West Pacific Pattern                                                              | WP           |
|                 | East Atlantic–West Russia Pattern                                                 | EAWR         |
|                 | Polar–Eurasia Pattern                                                             | POL          |
|                 | Scandinavia Pattern                                                               | SCA          |
|                 | 30 hPa Zonal Wind Index                                                           | 30ZW         |
|                 | 50 hPa Zonal Wind Index                                                           | 50ZW         |
|                 | Mid-Eastern Pacific 200mb Zonal Wind Index                                        | MPZW         |
|                 | West Pacific 850mb Trade Wind Index                                               | WPTW         |
|                 | Central Pacific 850mb Trade Wind Index                                            | CPTW         |
|                 | East Pacific 850mb Trade Wind Index                                               | EPTA         |
|                 | Atlantic–European Circulation W Pattern Index                                     | ACWP         |
|                 | Atlantic–European Circulation C Pattern Index                                     | ACCP         |
| Sea temperature | NINO 1+2 SSTA Index                                                               | NINO1+2      |
|                 | NINO 3 SSTA Index                                                                 | NINO3        |
|                 | NINO 4 SSTA Index                                                                 | NINO4        |
|                 | NINO 3.4 SSTA Index                                                               | NINO3.4      |
|                 | NINO W SSTA Index                                                                 | NINOW        |
|                 | NINO C SSTA Index                                                                 | NINOC        |
|                 | NINO A SSTA Index                                                                 | NINOA        |
|                 | Indian Ocean Warm Pool Strength Index                                             | IOWPS        |
|                 | Western Pacific Warm Pool Area Index                                              | WPWPA        |
|                 | Western Pacific Warm Pool Strength index                                          | WPWPS        |
|                 | Atlantic Multi-Decadal Oscillation Index                                          | AMO          |
|                 | Oyashio Current SST Index                                                         | OC           |
|                 | West Wind Drift Current SST Index                                                 | WWDC         |
|                 | Kuroshio Current SST Index                                                        | KC           |
|                 | NINO B SSTA Index                                                                 | NINOB        |

| Classification | Name                                 | Abbreviation |
|----------------|--------------------------------------|--------------|
|                | NINO Z SSTA Index                    | NINOZ        |
|                | Tropical Northern Atlantic SST Index | TNA          |
|                | Tropical Southern Atlantic SST Index | TSA          |
|                | Western Hemisphere Warm Pool Index   | WHWP         |
|                | Indian Ocean Warm Pool Area Index    | IOWPA        |
|                | ENSO Modoki Index                    | EM           |
|                | Nino Eastern Pacific index           | NE           |
|                | Nino Central Pacific index           | NC           |
|                | Indian Ocean Basin-Wide Index        | IOBW         |
|                | Tropic Indian Ocean Dipole Index     | TIOD         |
|                | South Indian Ocean Dipole Index      | SIOD         |
| Other          | Western North Pacific Typhoon number | WNPTN        |
|                | Number of Landing Typhoon on China   | NLTC         |
|                | Total Sunspot Number Index           | TSN          |
|                | Southern Oscillation Index           | SOI          |
|                | Atlantic Meridional Mode SST Index   | AMM          |
|                | Quasi-Biennial Oscillation Index     | QBO          |
|                | North Atlantic Triple index          | NAT          |

**Table S2.** Model performance measurements ( $R^2$ ,  $LCCC$ ,  $RMSE$ , and  $MAE$ ) for the calibration period using multi-variable linear regression (MLR) and random forest (RF) at 44 sites in northwestern China.

| No. of Site | MLR-Based |        |               |                | RF-Based |        |               |                |
|-------------|-----------|--------|---------------|----------------|----------|--------|---------------|----------------|
|             | $R^2$     | $LCCC$ | $MAE$<br>(mm) | $RMSE$<br>(mm) | $R^2$    | $LCCC$ | $MAE$<br>(mm) | $RMSE$<br>(mm) |
| 51053       | 0.863     | 0.927  | 17.5          | 22.4           | 0.869    | 0.929  | 16.5          | 21.9           |
| 51060       | 0.888     | 0.941  | 16.0          | 20.8           | 0.897    | 0.945  | 14.8          | 19.9           |
| 51068       | 0.901     | 0.948  | 14.5          | 19.3           | 0.900    | 0.946  | 14.2          | 19.3           |
| 51076       | 0.874     | 0.933  | 17.7          | 22.7           | 0.883    | 0.937  | 16.9          | 22.0           |
| 51087       | 0.870     | 0.931  | 17.7          | 23.1           | 0.873    | 0.931  | 17.1          | 22.9           |
| 51133       | 0.827     | 0.905  | 20.6          | 26.7           | 0.829    | 0.906  | 20.2          | 26.5           |
| 51156       | 0.816     | 0.899  | 15.8          | 22.0           | 0.825    | 0.903  | 15.4          | 21.5           |
| 51232       | 0.912     | 0.954  | 24.4          | 31.3           | 0.920    | 0.958  | 22.4          | 29.8           |
| 51238       | 0.872     | 0.931  | 14.4          | 19.0           | 0.867    | 0.928  | 14.2          | 19.3           |
| 51241       | 0.786     | 0.880  | 19.4          | 26.5           | 0.782    | 0.878  | 18.8          | 26.8           |
| 51243       | 0.914     | 0.955  | 20.2          | 26.1           | 0.925    | 0.960  | 17.6          | 24.4           |
| 51334       | 0.919     | 0.958  | 13.6          | 17.1           | 0.922    | 0.958  | 13.0          | 16.9           |
| 51367       | 0.897     | 0.945  | 17.2          | 22.6           | 0.907    | 0.950  | 15.7          | 21.5           |
| 51477       | 0.891     | 0.942  | 15.4          | 21.0           | 0.899    | 0.946  | 14.5          | 20.2           |
| 51526       | 0.930     | 0.964  | 13.7          | 17.6           | 0.934    | 0.965  | 12.1          | 17.2           |
| 51567       | 0.895     | 0.945  | 12.9          | 17.4           | 0.909    | 0.951  | 11.5          | 16.2           |
| 51573       | 0.903     | 0.949  | 17.6          | 21.9           | 0.932    | 0.963  | 14.4          | 18.5           |
| 51628       | 0.893     | 0.943  | 13.1          | 16.9           | 0.900    | 0.945  | 12.3          | 16.3           |
| 51656       | 0.910     | 0.953  | 14.8          | 19.1           | 0.927    | 0.960  | 12.8          | 17.3           |
| 51704       | 0.878     | 0.935  | 18.2          | 23.7           | 0.898    | 0.945  | 15.7          | 21.7           |
| 51705       | 0.733     | 0.846  | 21.7          | 27.5           | 0.735    | 0.847  | 21.3          | 27.4           |
| 51709       | 0.883     | 0.938  | 16.3          | 20.6           | 0.892    | 0.942  | 15.4          | 19.8           |
| 51720       | 0.847     | 0.917  | 16.2          | 21.9           | 0.867    | 0.927  | 14.2          | 20.5           |
| 51730       | 0.918     | 0.957  | 12.7          | 16.0           | 0.933    | 0.964  | 10.9          | 14.6           |
| 51765       | 0.929     | 0.963  | 13.3          | 16.9           | 0.944    | 0.970  | 11.1          | 15.1           |
| 51810       | 0.898     | 0.946  | 13.3          | 17.9           | 0.911    | 0.952  | 12.2          | 16.8           |
| 51811       | 0.900     | 0.948  | 13.4          | 17.5           | 0.911    | 0.952  | 12.5          | 16.6           |
| 51818       | 0.893     | 0.944  | 12.4          | 16.9           | 0.890    | 0.941  | 12.3          | 17.2           |
| 51828       | 0.917     | 0.957  | 12.5          | 16.1           | 0.920    | 0.957  | 12.1          | 15.8           |
| 51839       | 0.932     | 0.965  | 10.5          | 13.8           | 0.936    | 0.966  | 9.7           | 13.5           |

| No. of<br>Site | MLR-Based |        |               |                | RF-Based |        |               |                |
|----------------|-----------|--------|---------------|----------------|----------|--------|---------------|----------------|
|                | $R^2$     | $LCCC$ | $MAE$<br>(mm) | $RMSE$<br>(mm) | $R^2$    | $LCCC$ | $MAE$<br>(mm) | $RMSE$<br>(mm) |
| 51855          | 0.909     | 0.952  | 13.5          | 17.3           | 0.920    | 0.957  | 11.8          | 16.2           |
| 51931          | 0.885     | 0.939  | 12.2          | 16.9           | 0.892    | 0.942  | 11.2          | 16.4           |
| 52101          | 0.801     | 0.890  | 14.1          | 19.6           | 0.791    | 0.882  | 14.5          | 20.1           |
| 52112          | 0.930     | 0.964  | 21.3          | 26.8           | 0.947    | 0.972  | 17.9          | 23.4           |
| 52118          | 0.875     | 0.933  | 14.2          | 19.0           | 0.884    | 0.937  | 12.9          | 18.3           |
| 52203          | 0.905     | 0.950  | 15.6          | 19.8           | 0.924    | 0.960  | 13.6          | 17.8           |
| 52313          | 0.932     | 0.965  | 15.8          | 20.7           | 0.933    | 0.964  | 14.5          | 20.5           |
| 52323          | 0.898     | 0.946  | 14.8          | 19.4           | 0.902    | 0.947  | 14.0          | 19.2           |
| 52546          | 0.880     | 0.936  | 12.4          | 16.9           | 0.876    | 0.933  | 12.3          | 17.2           |
| 52652          | 0.850     | 0.919  | 13.6          | 17.7           | 0.850    | 0.917  | 13.3          | 17.7           |
| 52674          | 0.610     | 0.758  | 16.8          | 22.7           | 0.530    | 0.715  | 18.5          | 25.2           |
| 52679          | 0.750     | 0.857  | 14.8          | 20.0           | 0.735    | 0.848  | 14.9          | 20.6           |
| 52681          | 0.850     | 0.919  | 15.0          | 19.6           | 0.848    | 0.916  | 14.8          | 19.8           |
| 52797          | 0.663     | 0.797  | 18.1          | 24.3           | 0.647    | 0.792  | 18.3          | 24.9           |

**Table S3.** Model performance measurements ( $R^2$ ,  $LCCC$ ,  $RMSE$ , and  $MAE$ ) for the validation period using multi-variable linear regression model (MLR) and random forest model (RF) at 44 sites in northwestern China.

| No. of Site | MLR-Based |        |            |             | RF-Based |        |            |             |
|-------------|-----------|--------|------------|-------------|----------|--------|------------|-------------|
|             | $R^2$     | $LCCC$ | $MAE$ (mm) | $RMSE$ (mm) | $R^2$    | $LCCC$ | $MAE$ (mm) | $RMSE$ (mm) |
| 51053       | 0.830     | 0.908  | 18.1       | 24.1        | 0.857    | 0.924  | 16.6       | 21.9        |
| 51060       | 0.892     | 0.943  | 14.8       | 19.1        | 0.905    | 0.950  | 14.4       | 17.9        |
| 51068       | 0.904     | 0.946  | 15.1       | 20.4        | 0.911    | 0.938  | 14.7       | 21.1        |
| 51076       | 0.841     | 0.913  | 18.0       | 24.3        | 0.860    | 0.925  | 17.2       | 22.5        |
| 51087       | 0.867     | 0.909  | 20.8       | 26.8        | 0.857    | 0.920  | 18.1       | 24.4        |
| 51133       | 0.796     | 0.855  | 23.4       | 32.5        | 0.814    | 0.884  | 20.6       | 28.4        |
| 51156       | 0.828     | 0.900  | 17.3       | 22.0        | 0.822    | 0.895  | 16.1       | 21.6        |
| 51232       | 0.916     | 0.951  | 23.1       | 30.4        | 0.919    | 0.958  | 19.5       | 27.0        |
| 51238       | 0.840     | 0.915  | 17.1       | 22.2        | 0.848    | 0.901  | 16.3       | 22.6        |
| 51241       | 0.743     | 0.850  | 21.1       | 28.6        | 0.746    | 0.857  | 19.4       | 27.8        |
| 51243       | 0.880     | 0.920  | 22.7       | 30.4        | 0.918    | 0.951  | 16.1       | 22.6        |
| 51334       | 0.923     | 0.944  | 16.4       | 21.2        | 0.936    | 0.937  | 15.8       | 21.5        |
| 51367       | 0.917     | 0.954  | 16.7       | 21.6        | 0.898    | 0.924  | 19.2       | 26.4        |
| 51477       | 0.887     | 0.927  | 16.0       | 21.8        | 0.937    | 0.961  | 11.4       | 15.0        |
| 51526       | 0.928     | 0.963  | 13.6       | 17.7        | 0.950    | 0.971  | 11.2       | 15.3        |
| 51567       | 0.907     | 0.932  | 15.9       | 19.9        | 0.913    | 0.930  | 14.6       | 19.6        |
| 51573       | 0.824     | 0.877  | 28.8       | 36.4        | 0.890    | 0.881  | 26.2       | 34.8        |
| 51628       | 0.864     | 0.916  | 16.7       | 21.6        | 0.873    | 0.904  | 17.2       | 22.4        |
| 51656       | 0.866     | 0.910  | 20.0       | 26.3        | 0.886    | 0.920  | 17.0       | 23.8        |
| 51704       | 0.861     | 0.921  | 17.8       | 23.4        | 0.879    | 0.931  | 15.0       | 21.9        |
| 51705       | 0.622     | 0.747  | 25.4       | 32.2        | 0.668    | 0.793  | 22.6       | 29.1        |
| 51709       | 0.853     | 0.915  | 20.7       | 24.9        | 0.867    | 0.908  | 20.3       | 24.8        |
| 51720       | 0.789     | 0.878  | 17.4       | 23.2        | 0.830    | 0.910  | 12.4       | 18.1        |
| 51730       | 0.894     | 0.927  | 16.8       | 20.4        | 0.915    | 0.948  | 12.9       | 17.0        |
| 51765       | 0.927     | 0.943  | 17.3       | 21.1        | 0.943    | 0.948  | 14.7       | 19.3        |
| 51810       | 0.886     | 0.927  | 16.8       | 20.8        | 0.894    | 0.923  | 16.1       | 20.6        |
| 51811       | 0.898     | 0.932  | 16.4       | 19.6        | 0.909    | 0.940  | 14.1       | 18.0        |
| 51818       | 0.862     | 0.923  | 13.8       | 20.2        | 0.872    | 0.932  | 12.4       | 19.1        |
| 51828       | 0.892     | 0.944  | 13.7       | 18.4        | 0.900    | 0.947  | 12.5       | 17.9        |
| 51839       | 0.895     | 0.944  | 12.0       | 17.2        | 0.898    | 0.948  | 10.3       | 16.3        |

| No. of<br>Site | MLR-Based |        |            |                | RF-Based |        |               |                |
|----------------|-----------|--------|------------|----------------|----------|--------|---------------|----------------|
|                | $R^2$     | $LCCC$ | $MAE$ (mm) | $RMSE$<br>(mm) | $R^2$    | $LCCC$ | $MAE$<br>(mm) | $RMSE$<br>(mm) |
| 51855          | 0.906     | 0.873  | 26.1       | 30.5           | 0.926    | 0.873  | 21.9          | 28.4           |
| 51931          | 0.864     | 0.908  | 16.1       | 20.9           | 0.889    | 0.914  | 13.9          | 19.2           |
| 52101          | 0.748     | 0.859  | 16.5       | 22.1           | 0.725    | 0.843  | 16.7          | 22.9           |
| 52112          | 0.943     | 0.964  | 19.4       | 25.3           | 0.951    | 0.971  | 16.7          | 22.8           |
| 52118          | 0.854     | 0.919  | 16.1       | 20.9           | 0.880    | 0.936  | 13.0          | 18.4           |
| 52203          | 0.927     | 0.936  | 18.7       | 22.3           | 0.936    | 0.956  | 13.1          | 18.0           |
| 52313          | 0.932     | 0.965  | 15.8       | 20.3           | 0.953    | 0.976  | 12.6          | 16.6           |
| 52323          | 0.906     | 0.944  | 17.0       | 21.0           | 0.912    | 0.948  | 15.6          | 19.6           |
| 52546          | 0.847     | 0.878  | 20.0       | 24.7           | 0.853    | 0.887  | 18.4          | 23.5           |
| 52652          | 0.820     | 0.874  | 19.1       | 23.6           | 0.835    | 0.873  | 18.3          | 23.4           |
| 52674          | 0.535     | 0.699  | 19.8       | 24.9           | 0.488    | 0.677  | 20.3          | 26.2           |
| 52679          | 0.635     | 0.778  | 18.7       | 25.9           | 0.644    | 0.772  | 18.4          | 25.6           |
| 52681          | 0.836     | 0.907  | 17.3       | 21.6           | 0.862    | 0.915  | 15.8          | 20.0           |
| 52797          | 0.555     | 0.716  | 19.3       | 27.0           | 0.587    | 0.749  | 17.8          | 25.4           |

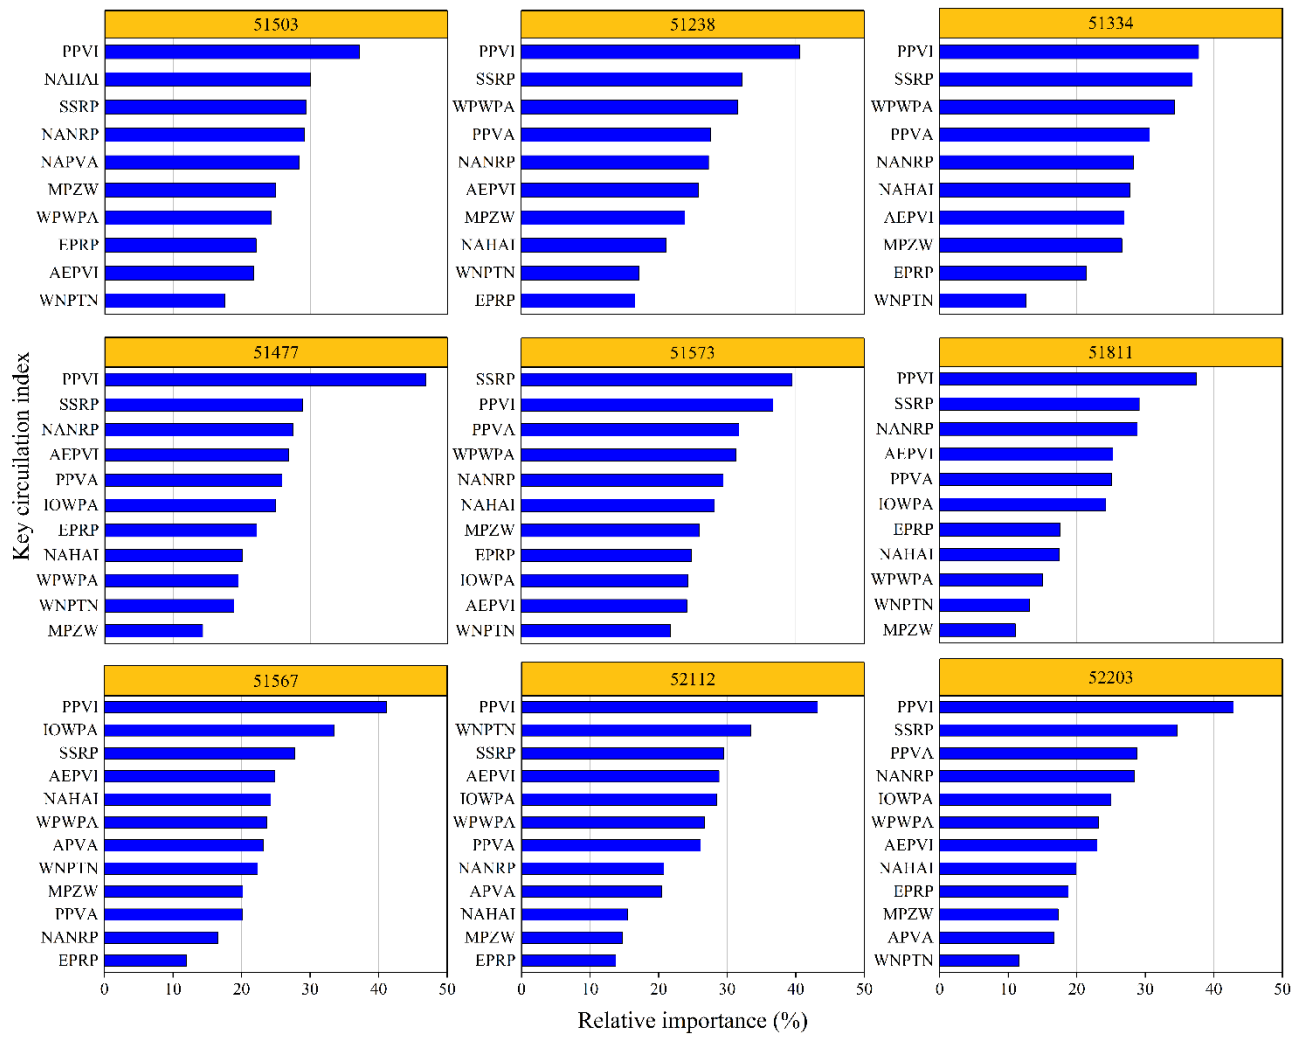

**Figure S1.** The importance of different predictor variables used in the RF model to predict monthly *D* at 9 representative sites in northwestern China.
